# Supplementary material for: Magnetically driven omnidirectional artificial microswimmers
Source: Royal Society of Chemistry journal article supplement (doi:10.1039/c8sm00230d), 2018-01-01
Supplement: c8sm00230d1.pdf [file c8sm00230d1.pdf]

## Magnetically driven omnidirectional artificial microswimmers

### Supplementary Information

Mojca Vilfan,<sup>a</sup> Natan Osterman,<sup>a,b</sup> and Andrej Vilfan<sup>a</sup>

<sup>a</sup>J. Stefan Institute, Jamova 39, 1000 Ljubljana, Slovenia.

<sup>b</sup>Faculty of Mathematics and Physics, University of Ljubljana, Jadranska 19, 1000 Ljubljana, Slovenia.

Movie 1: The first type of magnetically actuated artificial swimmers, the throwers. The cycle frequency is 2 Hz and to exclude drifting effects, we always observed swimmers moving in opposite directions. The diameter of the large sphere is 4.5 microns.

Movie 2: A close-up on the motion of a thrower at 0.3 Hz. The diameter of the large sphere is 4.5 microns.

Movie 3: A close-up on the motion of a thrower at 8 Hz. The diameter of the large sphere is 4.5 microns.

Movie 4: The second type of magnetically actuated swimmer, the rower. The rower is wedged between two glass plates, making the swimming more efficient. The cycle frequency is 1 Hz and the diameters of the spheres are 2.7 microns.

Movie 5: Omnidirectional magnetic swimmer. The same magnetic field sequence is used to drive the rower around a circular track. The sphere diameter is 2.7 microns.
